# Supplementary material for: Potential of seasonal hydrological forecasting of monthly run-offvolumes for the Rhone and Arve Rivers from April to July
Source: Copernicus journal article supplement (doi:10.5194/hess-2018-119), 2018-04-06
Supplement: Supplementary file 1 [file hess-2018-119-supplement.pdf]

| Duration | Indicator | March  | April  | May    | June   | July   | August | September | October |
|----------|-----------|--------|--------|--------|--------|--------|--------|-----------|---------|
| 120 days | Thinness  | 25 % ★ | 24 % ★ | 8 % ★  | 17 % ★ | 19 % ★ | 17 % ★ | 2 % ♦     | 21 % ★  |
|          | Accuracy  | 0.35   | 0.73 ★ | 0.38   | 0.54 ♦ | 0.69 ★ | 0.48   | -0.11     | 0.38    |
| 120 days | Thinness  | 25 % ★ | 24 % ★ | 8 % ★  | 17 % ★ | 19 % ★ | 17 % ★ | 2 % ♦     | 21 % ★  |
|          | Accuracy* | 0.39   | 0.87 ★ | 0.83 ★ | 0.74 ★ | 0.68 ★ | 0.48   | -0.06     | 0.47    |
| 90 days  | Thinness  | 27 % ★ | 41 % ★ | 9 % ★  | 21 % ★ | 21 % ★ | -7 %   | 0 % ♦     | 18 % ★  |
|          | Accuracy  | 0.39   | 0.79 ★ | 0.49   | 0.52 ♦ | 0.50 ♦ | 0.49   | -0.10     | 0.43    |
| 90 days  | Thinness  | 27 % ★ | 41 % ★ | 9 % ★  | 21 % ★ | 21 % ★ | -7 %   | 0 % ♦     | 18 % ★  |
|          | Accuracy* | 0.39   | 0.82 ★ | 0.88 ★ | 0.77 ★ | 0.45   | 0.45   | -0.01     | 0.53 ♦  |
| 30 days  | Thinness  | 35 % ★ | 66 % ★ | 34 % ★ | 31 % ★ | 17 % ★ | 3 % ♦  | -15 %     | -2 % ♦  |
|          | Accuracy  | 0.54 ♦ | 0.92 ★ | 0.60 ★ | 0.74 ★ | 0.50 ♦ | 0.46   | -0.01     | 0.45    |

**Table S1. Indicators for the Arve River for the different horizons. ★ indicates good scores, ♦ average scores, and the rest are non-relevant scores. The \* indicates the corrected indicators for scenarios excluding the forecast of 2007.**

| Duration  | Indicator | March  | April  | May    | June   | July   | August | September | October |
|-----------|-----------|--------|--------|--------|--------|--------|--------|-----------|---------|
| 120 days  | Thinness  | 7 % ★  | 30 % ★ | 18 % ★ | 44 % ★ | 33 % ★ | -24 %  | -99 %     | -58 %   |
|           | Accuracy  | 0.40   | 0.76 ★ | 0.73 ★ | 0.63 ★ | 0.61 ★ | 0.55 ♦ | -0.35     | 0.03    |
| 120 days* | Thinness  | 15 % ★ | 36 % ★ | 24 % ★ | 47 % ★ | 37 % ★ | -14 %  | -84 %     | -45 %   |
|           | Accuracy  | 0.40   | 0.76 ★ | 0.73 ★ | 0.63 ★ | 0.61 ★ | 0.55 ♦ | -0.35     | 0.03    |
| 90 days   | Thinness  | 9 % ★  | 32 % ★ | 3 % ♦  | 45 % ★ | 39 % ★ | 2 % ♦  | -114 %    | -51 %   |
|           | Accuracy  | 0.41   | 0.73 ★ | 0.72 ★ | 0.65 ★ | 0.62 ★ | 0.32   | -0.22     | 0.27    |
| 90 days*  | Thinness  | 15 % ★ | 40 % ★ | 12 % ★ | 48 % ★ | 41 % ★ | 9 % ★  | -90 %     | -38 %   |
|           | Accuracy  | 0.41   | 0.73 ★ | 0.72 ★ | 0.65 ★ | 0.62 ★ | 0.32   | -0.22     | 0.27    |
| 30 days   | Thinness  | -6%    | -33 %  | 31 % ★ | 0 % ♦  | 23 % ★ | 38 % ★ | -31 %     | -19 %   |
|           | Accuracy  | 0.28   | 0.56 ♦ | 0.70 ★ | 0.65 ★ | 0.60 ★ | 0.28   | -0.35     | 0.27    |
| 30 days*  | Thinness  | -25 %  | -20 %  | 41 % ★ | 11 % ★ | 25 % ★ | 39 % ★ | -24 %     | 2 % ♦   |
|           | Accuracy  | 0.28   | 0.56 ♦ | 0.70 ★ | 0.65 ★ | 0.60 ★ | 0.28   | -0.35     | 0.27    |

**Table S2. Indicators for the Rhone River for the different horizons. ★ indicates good scores, ♦ average scores, and the rest are non-relevant scores. \* indicates the corrected volumes for the different lead times.**
